# Supplementary material
Source: PubMed Central journal article supplement (PMC7528279)
Supplement: ao0c03594_si_001.pdf [file ao0c03594_si_001.pdf]

# Supporting Information

## Altering the Solubility of the Antibiotic Candidate Nisin – A Computational Study

*Preeti Pandey<sup>#\*</sup>, Ulrich H.E. Hansmann<sup>#\*</sup> and Feng Wang<sup>+\*</sup>*

<sup>#</sup>Dept. of Chemistry & Biochemistry, University of Oklahoma, Norman, Ok 73019, USA

<sup>+</sup>Dept. of Chemistry and Biochemistry, University of Arkansas, Fayetteville, AR 72701, USA

## Supplementary Tables

**Table S1.** Calculated p-values of statistical test (Welch's t-test) for solvation free energy (GBSA and PBSA) of nisin and its mutant forms as calculated from simulations using parameters of de Miguel *et al.*<sup>1</sup> and Turpin *et al.*<sup>2</sup>

| Se. No. |       | $\Delta G_{\text{sol}}$ (GBSA) |               |                                    | $\Delta G_{\text{sol}}$ (PBSA) ( $\epsilon_{\text{in}} = 4$ ) |              |                                    |
|---------|-------|--------------------------------|---------------|------------------------------------|---------------------------------------------------------------|--------------|------------------------------------|
|         |       | de Miguel                      | Turpin        | Significantly different? (p-value) | de Miguel                                                     | Turpin       | Significantly different? (p-value) |
| 1.      | WT    | -594.3 ± 31.5                  | -584.0 ± 26.8 | Yes (<0.001)                       | -136.0 ± 7.4                                                  | -134.1 ± 6.1 | Yes (<0.001)                       |
| 2.      | N20K  | -732.2 ± 34.4                  | -743.6 ± 29.7 | Yes (<0.001)                       | -170.0 ± 8.5                                                  | -171.8 ± 7.0 | Yes (<0.001)                       |
| 3.      | M21K  | -752.3 ± 36.8                  | -739.9 ± 34.6 | Yes (<0.001)                       | -173.9 ± 8.7                                                  | -171.6 ± 8.0 | Yes (<0.001)                       |
| 4.      | KK-NP | -592.9 ± 36.6                  | -610.0 ± 25.7 | Yes (<0.001)                       | -136.0 ± 8.3                                                  | -139.4 ± 6.4 | Yes (<0.001)                       |
| 5.      | KK-PP | -917.1 ± 29.3                  | -914.2 ± 31.9 | No (0.101)                         | -214.5 ± 7.0                                                  | -212.9 ± 7.2 | Yes (<0.001)                       |
| 6.      | N20Q  | -595.6 ± 31.3                  | -603.0 ± 24.4 | Yes (<0.001)                       | -136.5 ± 7.2                                                  | -137.9 ± 5.7 | Yes (<0.001)                       |
| 7.      | N20R  | -731.4 ± 36.3                  | -729.8 ± 31.1 | No (0.412)                         | -168.4 ± 8.6                                                  | -168.7 ± 7.1 | No (0.51)                          |
| 8.      | K22R  | -581.6 ± 29.2                  | -589.9 ± 26.6 | Yes (<0.001)                       | -131.6 ± 6.8                                                  | -134.0 ± 6.0 | Yes (<0.001)                       |
| 9.      | RR    | -731.3 ± 33.7                  | -710.1 ± 36.7 | Yes (<0.001)                       | -168.0 ± 7.9                                                  | -164.2 ± 8.3 | Yes (<0.001)                       |
| 10.     | N20H  | -601.5 ± 25.0                  | -588.9 ± 25.1 | Yes (<0.001)                       | -137.9 ± 5.9                                                  | -134.6 ± 5.6 | Yes (<0.001)                       |
| 11.     | M21H  | -611.8 ± 27.1                  | -602.9 ± 21.3 | Yes (<0.001)                       | -140.1 ± 6.3                                                  | -138.1 ± 5.0 | Yes (<0.001)                       |
| 12.     | K22H  | -470.0 ± 31.7                  | -490.7 ± 28.3 | Yes (<0.001)                       | -105.9 ± 7.2                                                  | -111.3 ± 6.5 | Yes (<0.001)                       |
| 13.     | N20E  | -549.7 ± 58.3                  | -576.5 ± 39.9 | Yes (<0.001)                       | -124.0 ± 13.9                                                 | -131.6 ± 9.2 | Yes (<0.001)                       |
| 14.     | M21E  | -552.6 ± 47.2                  | -571.9 ± 37.6 | Yes (<0.001)                       | -126.2 ± 10.9                                                 | -130.2 ± 8.8 | Yes (<0.001)                       |
| 15.     | K22E  | -486.9 ± 36.9                  | -495.7 ± 32.6 | Yes (<0.001)                       | -108.8 ± 8.6                                                  | -111.4 ± 7.9 | Yes (<0.001)                       |
| 16.     | N20V  | -569.4 ± 42.2                  | -595.6 ± 24.3 | Yes (<0.001)                       | -130.7 ± 9.5                                                  | -135.8 ± 5.6 | Yes (<0.001)                       |
| 17.     | N20F  | -600.3 ± 29.3                  | -596.8 ± 22.7 | Yes (0.021)                        | -136.9 ± 6.8                                                  | -135.5 ± 5.2 | Yes (<0.001)                       |
| 18.     | M21G  | -593.1 ± 31.3                  | -601.1 ± 20.6 | Yes (<0.001)                       | -135.8 ± 7.3                                                  | -137.5 ± 4.9 | Yes (<0.001)                       |
| 19.     | K22G  | -454.6 ± 34.4                  | -484.5 ± 23.5 | Yes (<0.001)                       | -102.3 ± 7.8                                                  | -108.8 ± 5.5 | Yes (<0.001)                       |
| 20.     | FLQ   | -481.4 ± 23.4                  | -476.2 ± 22.4 | Yes (<0.001)                       | -108.2 ± 5.4                                                  | -106.6 ± 5.1 | Yes (<0.001)                       |

**Table S2.** Components of the solvation free energy ( $\Delta G_{\text{sol}}$ ) of nisin and mutants as measured in simulations using parameters of de Miguel *et al.*<sup>1</sup> and Turpin *et al.*<sup>2</sup> using PBSA.

| Se. No. |       | de Miguel                   |                            |                             | Turpin                     |                             |                            |
|---------|-------|-----------------------------|----------------------------|-----------------------------|----------------------------|-----------------------------|----------------------------|
|         |       | $\Delta G_{\text{sol,pol}}$ | $\Delta G_{\text{sol,np}}$ | $\Delta G_{\text{sol,pol}}$ | $\Delta G_{\text{sol,np}}$ | $\Delta G_{\text{sol,pol}}$ | $\Delta G_{\text{sol,np}}$ |
| 1.      | WT    | -152.9 ± 7.5                | 16.8 ± 1.5                 | -136.0 ± 7.4                | -150.6 ± 6.6               | 16.5 ± 1.1                  | -134.1 ± 6.1               |
| 2.      | N20K  | -186.0 ± 8.0                | 15.9 ± 1.5                 | -170.0 ± 8.5                | -189.5 ± 7.1               | 17.7 ± 1.4                  | -171.8 ± 7.0               |
| 3.      | M21K  | -191.3 ± 8.9                | 17.4 ± 1.0                 | -173.9 ± 8.7                | -189.1 ± 8.3               | 17.4 ± 1.5                  | -171.6 ± 8.0               |
| 4.      | KK-NP | -152.8 ± 9.0                | 16.8 ± 1.4                 | -136.0 ± 8.3                | -157.6 ± 6.0               | 18.2 ± 1.3                  | -139.4 ± 6.4               |
| 5.      | KK-PP | -231.6 ± 6.9                | 17.1 ± 1.5                 | -214.5 ± 7.0                | -230.9 ± 7.6               | 18.0 ± 1.0                  | -212.9 ± 7.2               |
| 6.      | N20Q  | -153.1 ± 7.4                | 16.6 ± 0.8                 | -136.5 ± 7.2                | -154.6 ± 5.8               | 16.7 ± 0.7                  | -137.9 ± 5.7               |
| 7.      | N20R  | -185.7 ± 8.2                | 17.3 ± 1.1                 | -168.4 ± 8.6                | -186.2 ± 7.5               | 17.5 ± 1.0                  | -168.7 ± 7.1               |
| 8.      | K22R  | -149.7 ± 7.2                | 18.1 ± 1.2                 | -131.6 ± 6.8                | -151.5 ± 6.4               | 17.6 ± 1.1                  | -134.0 ± 6.0               |
| 9.      | RR    | -186.3 ± 7.9                | 18.2 ± 1.4                 | -168.0 ± 7.9                | -181.0 ± 8.7               | 16.8 ± 1.2                  | -164.2 ± 8.3               |
| 10.     | N20H  | -154.8 ± 5.9                | 16.9 ± 0.8                 | -137.9 ± 5.9                | -151.8 ± 6.1               | 17.2 ± 1.1                  | -134.6 ± 5.6               |
| 11.     | M21H  | -156.6 ± 6.6                | 16.5 ± 1.5                 | -140.1 ± 6.3                | -155.1 ± 5.1               | 17.0 ± 0.7                  | -138.1 ± 5.0               |
| 12.     | K22H  | -122.8 ± 7.7                | 17.0 ± 1.2                 | -105.9 ± 7.2                | -128.3 ± 6.9               | 17.0 ± 0.8                  | -111.3 ± 6.5               |
| 13.     | N20E  | -141.1 ± 15.1               | 17.1 ± 1.6                 | -124.0 ± 13.9               | -148.3 ± 10.3              | 16.7 ± 1.5                  | -131.6 ± 9.2               |
| 14.     | M21E  | -142.5 ± 12.1               | 16.4 ± 1.7                 | -126.2 ± 10.9               | -147.3 ± 9.2               | 17.0 ± 1.3                  | -130.2 ± 8.8               |
| 15.     | K22E  | -125.8 ± 9.5                | 17.0 ± 1.4                 | -108.8 ± 8.6                | -128.0 ± 7.9               | 16.6 ± 1.0                  | -111.4 ± 7.9               |
| 16.     | N20V  | -146.5 ± 9.9                | 15.8 ± 1.1                 | -130.7 ± 9.5                | -153.6 ± 6.1               | 17.8 ± 1.2                  | -135.8 ± 5.6               |
| 17.     | N20F  | -154.4 ± 7.1                | 17.5 ± 0.9                 | -136.9 ± 6.8                | -154.2 ± 5.6               | 18.7 ± 1.3                  | -135.5 ± 5.2               |
| 18.     | M21G  | -152.4 ± 7.6                | 16.6 ± 1.1                 | -135.8 ± 7.3                | -155.0 ± 5.0               | 17.4 ± 1.0                  | -137.5 ± 4.9               |
| 19.     | K22G  | -118.1 ± 9.1                | 15.8 ± 1.9                 | -102.3 ± 7.8                | -126.3 ± 6.0               | 17.4 ± 1.4                  | -108.8 ± 5.5               |
| 20.     | FLQ   | -125.2 ± 5.9                | 17.0 ± 1.7                 | -108.2 ± 5.4                | -124.1 ± 5.3               | 17.6 ± 0.9                  | -106.6 ± 5.1               |

## Supplementary Figures

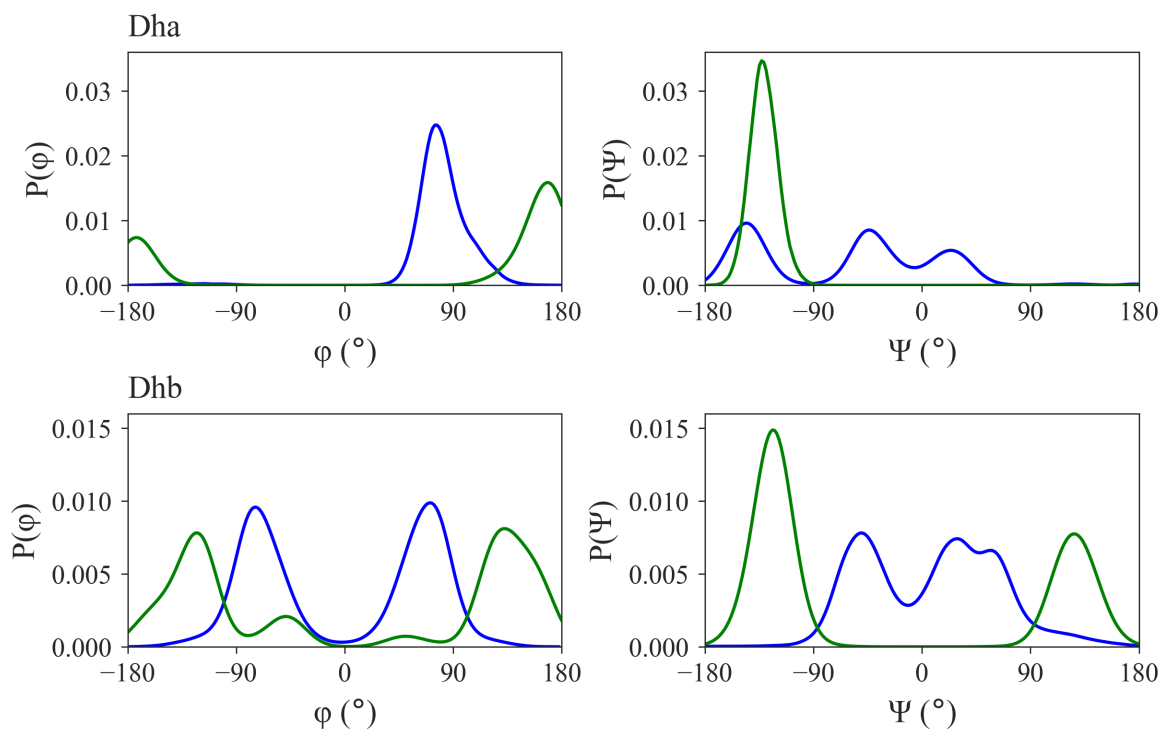

**Figure S1.** Phi-psi ( $\phi/\psi$ ) backbone dihedral angle distribution of Dehydroalanine and Dehydrobutyrine as measured in simulations relying either on the parameter set of de Miguel *et al.*<sup>1</sup> (blue) or the one by Turpin *et al.*<sup>2</sup> (green).

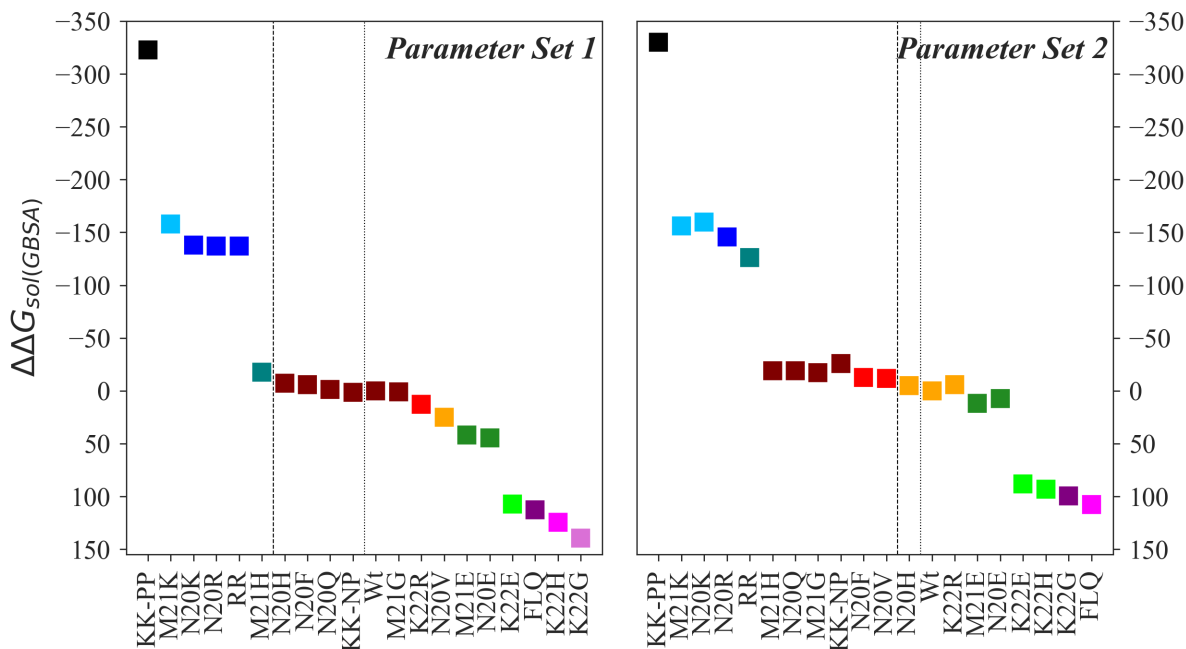

**Figure S2.** Effect of mutation on the solubility of nisin estimated using GBSA. The figure shows the difference between the solvation free energies of mutant and wild-type nisin ( $\Delta\Delta G_{sol} = \Delta G_{mutant} - \Delta G_{wt}$ ). Nisin and mutants are ranked in decreasing order of solubility. A different color is used for each rank, and a matching color is assigned to the mutants with the same rank. Statistical significance is determined by using multiple comparison Tukey's test at  $\alpha=0.05$ . Data in the left figure are from simulations relying on the parameters of de Miguel *et al.*<sup>1</sup> (*Parameter Set 1*) and the ones in the right figure on the parameter set of Turpin *et al.*<sup>2</sup> (*Parameter Set 2*)

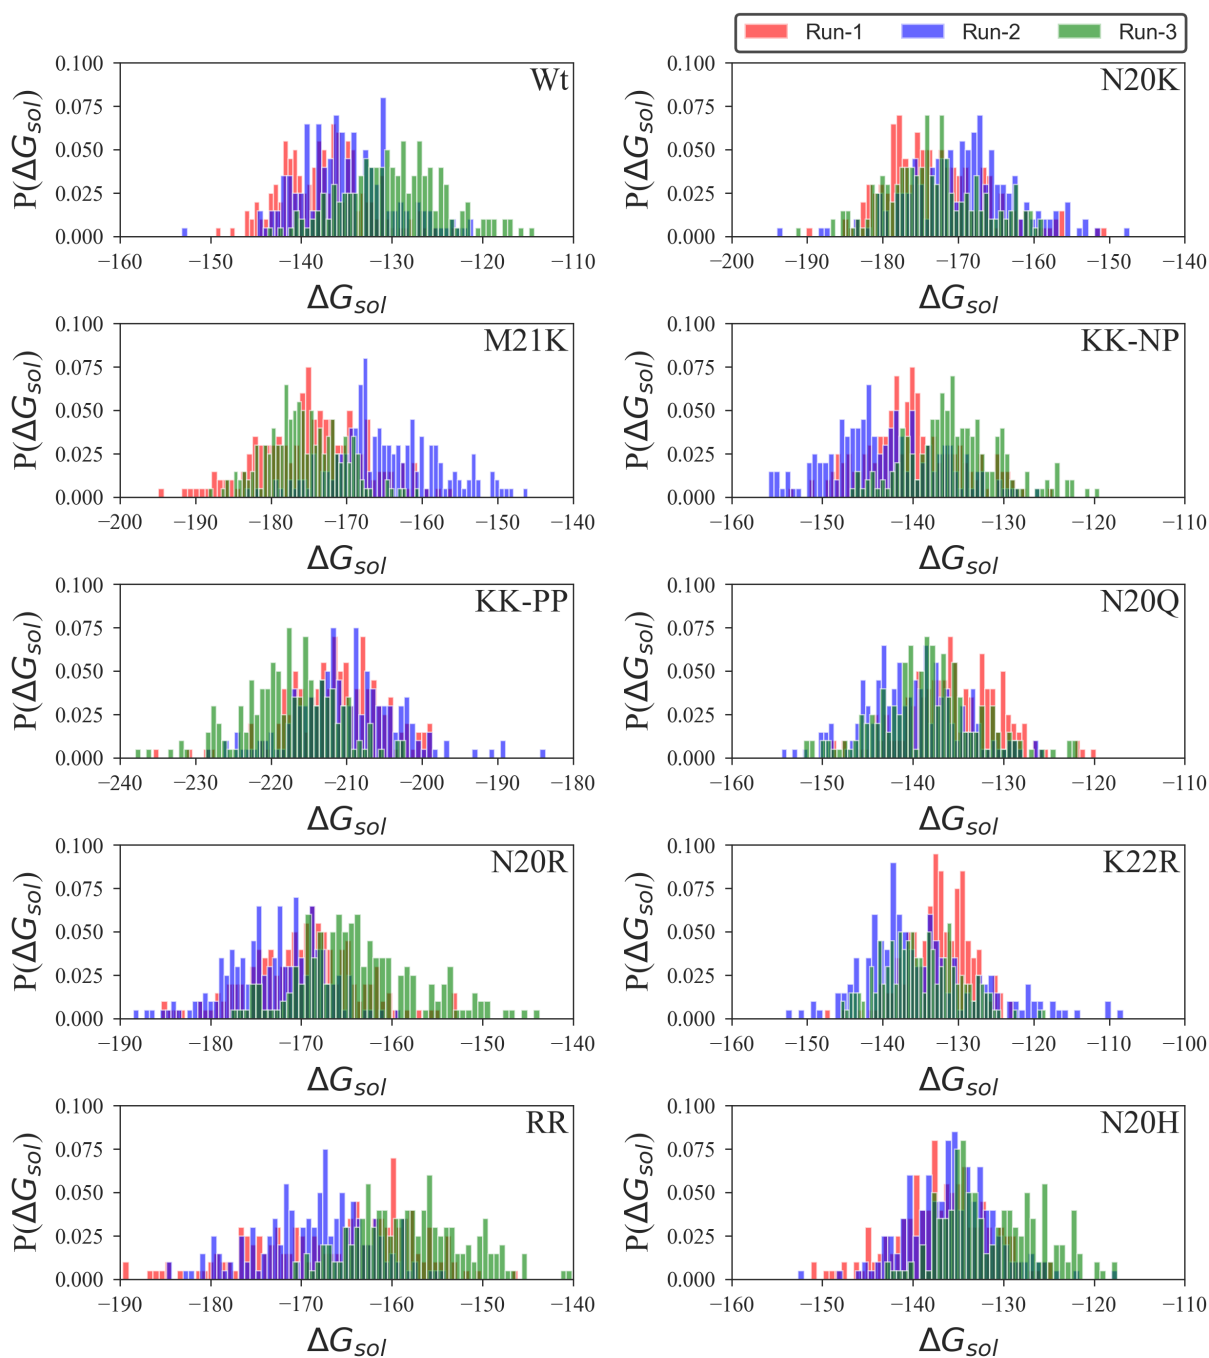

**Figure S3 (a).** Distribution of solvation free energy of wild-type nisin and mutants estimated using PBSA using parameters of Turpin *et al.*<sup>2</sup>

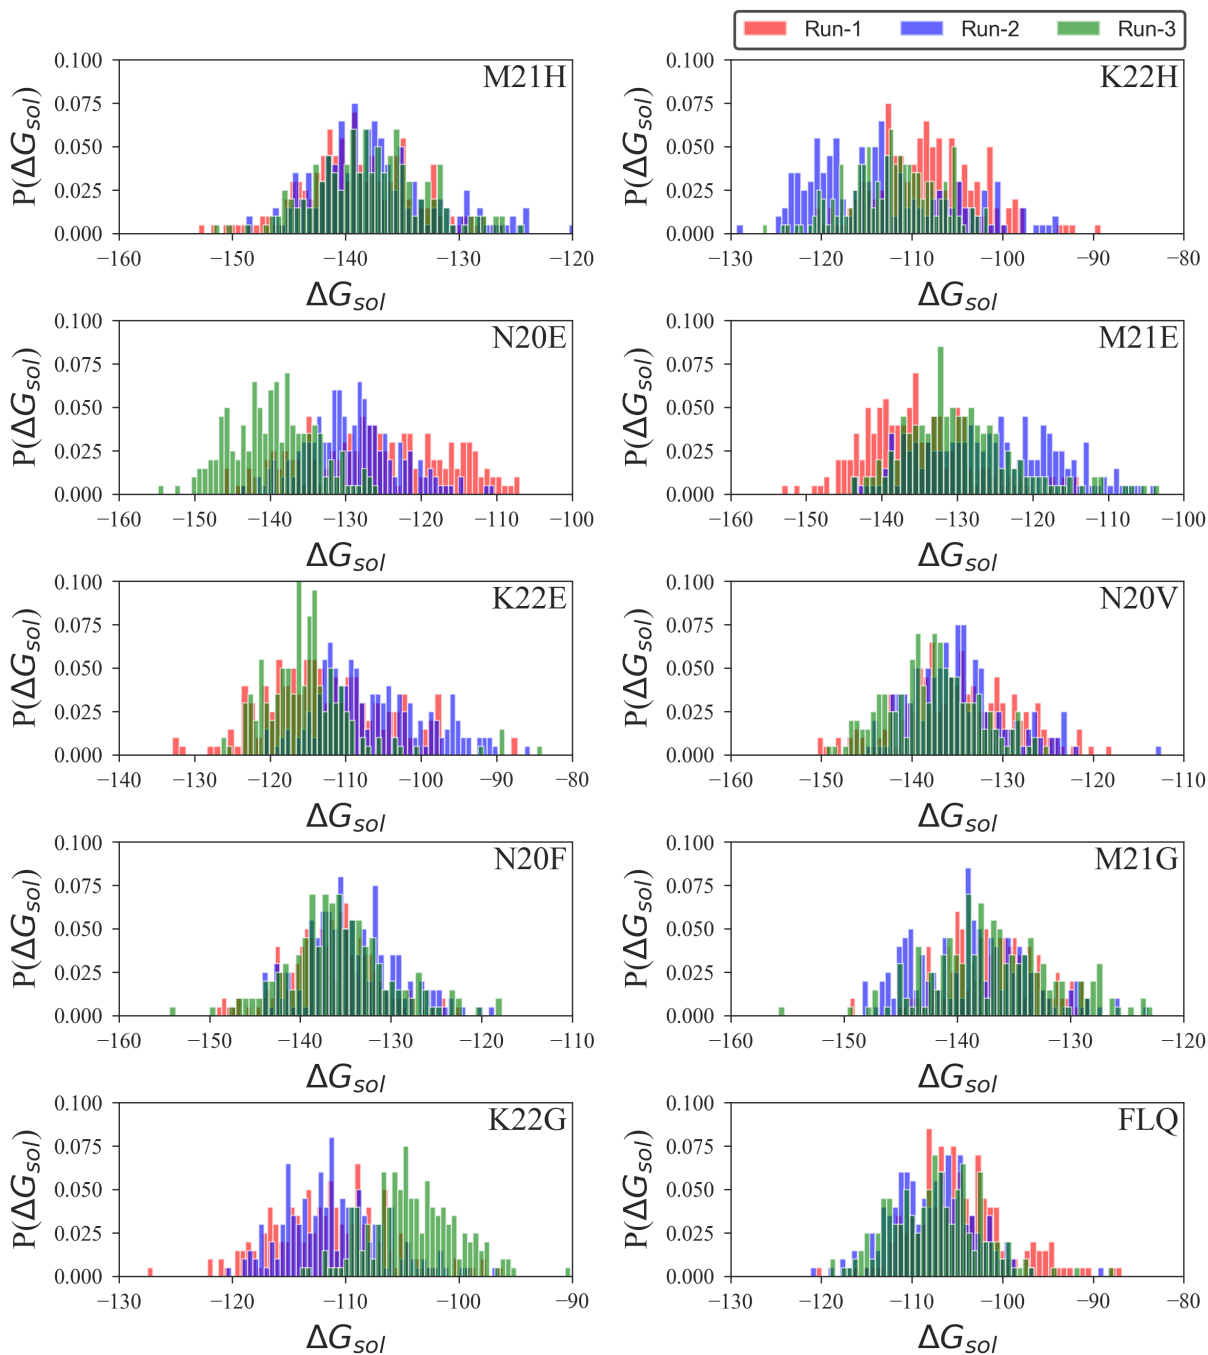

**Figure S3 (b).** Distribution of solvation free energy of wild-type nisin and mutants estimated using PBSA using parameters of Turpin *et al.*<sup>2</sup>

## References:

- (1) de Miguel, A.; Tapia-Rojo, R.; Utesch, T.; Mroginski, M. A. Structure, Dynamics and Kinetics of Two-Component Lantibiotic Lichenicidin. *PLoS One* **2017**, *12* (6), e0179962.
- (2) Turpin, E. R.; Mulholland, S.; Teale, A. M.; Bonev, B. B.; Hirst, J. D. New CHARMM Force Field Parameters for Dehydrated Amino Acid Residues, the Key to Lantibiotic Molecular Dynamics Simulations. *RSC Adv.* **2014**, *4* (89), 48621–48631.
